# Supplementary material for: A ferrocene redox-active triazolium macrocycle that binds and senses chloride
Source: PubMed Central journal article supplement (PMC3302085; doi:10.3762/bjoc.8.25), 2012-02-13

# Supporting Information

for

## **A ferrocene redox-active triazolium macrocycle that binds and senses chloride**

Nicholas G. White and Paul D. Beer\*

Address: Chemistry Research Laboratory, Mansfield Road, Oxford, OX1 3TA, United Kingdom

Email: Paul D. Beer - paul.beer@chem.ox.ac.uk

\* Corresponding author

## **NMR spectra of new compounds**

All spectra recorded at 293 K. The  $^1\text{H}$  spectra at 300 MHz,  $^{13}\text{C}$  at 75.5 MHz.

2

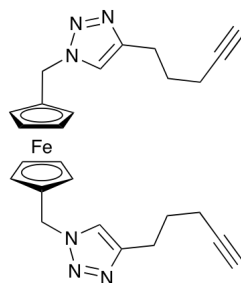

$^1\text{H}$  ( $\text{CDCl}_3$ )

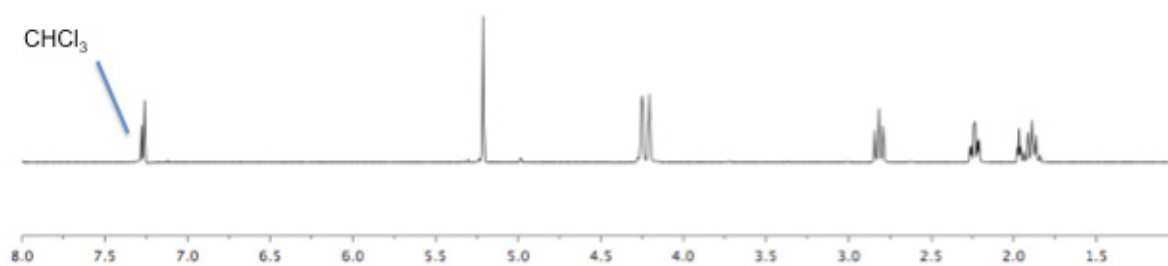

$^{13}\text{C}$  ( $\text{CDCl}_3$ )

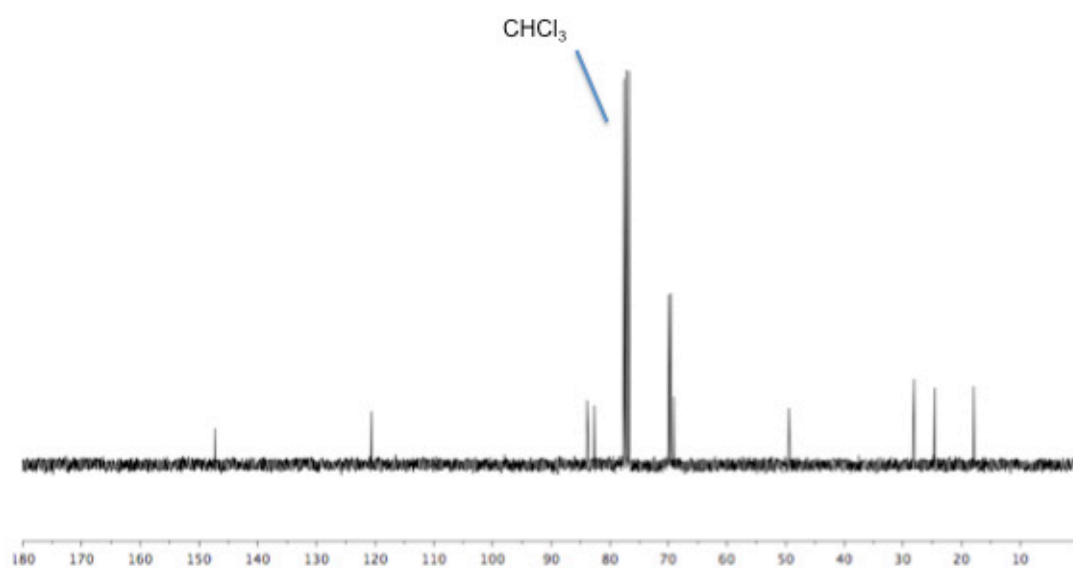

**3**

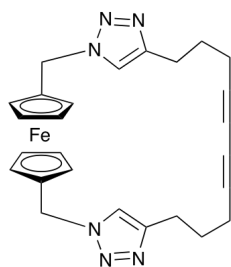

**$^1\text{H}$  ( $\text{CDCl}_3$ )**

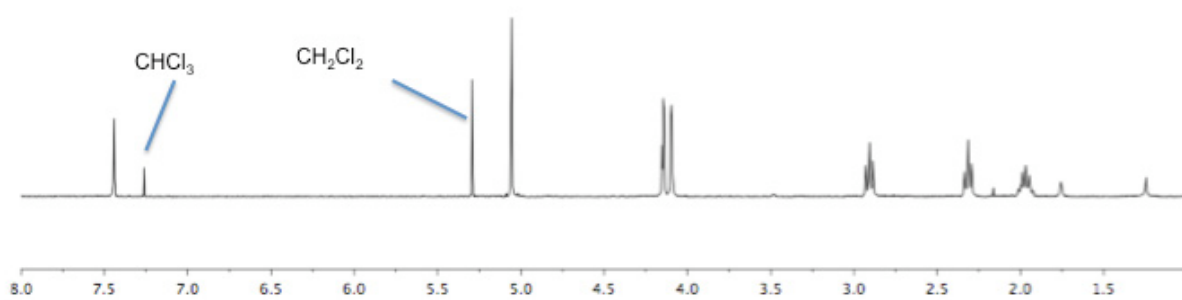

**$^{13}\text{C}$  ( $\text{CDCl}_3$ )**

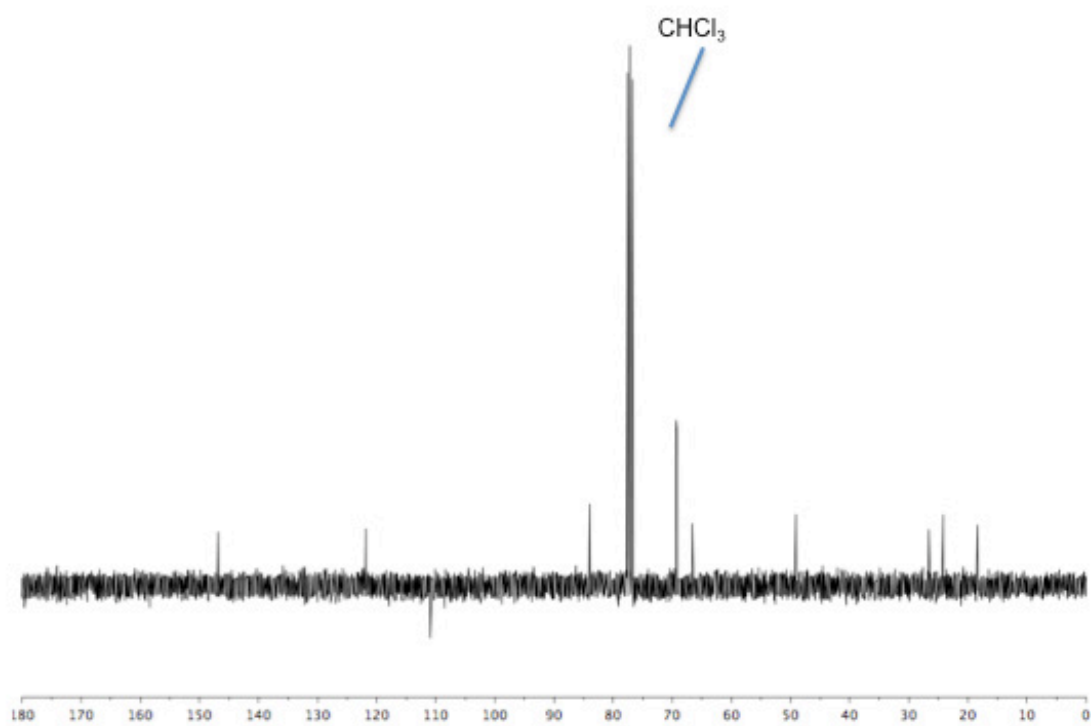

4

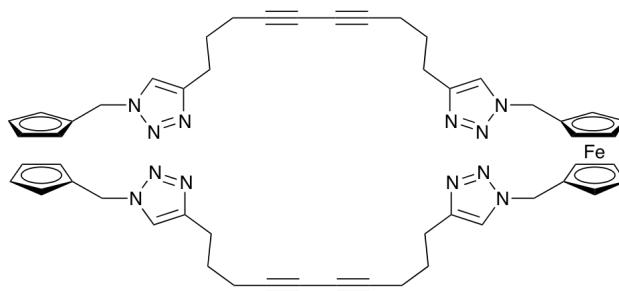

$^1\text{H}$  (acetone- $d_6$ )

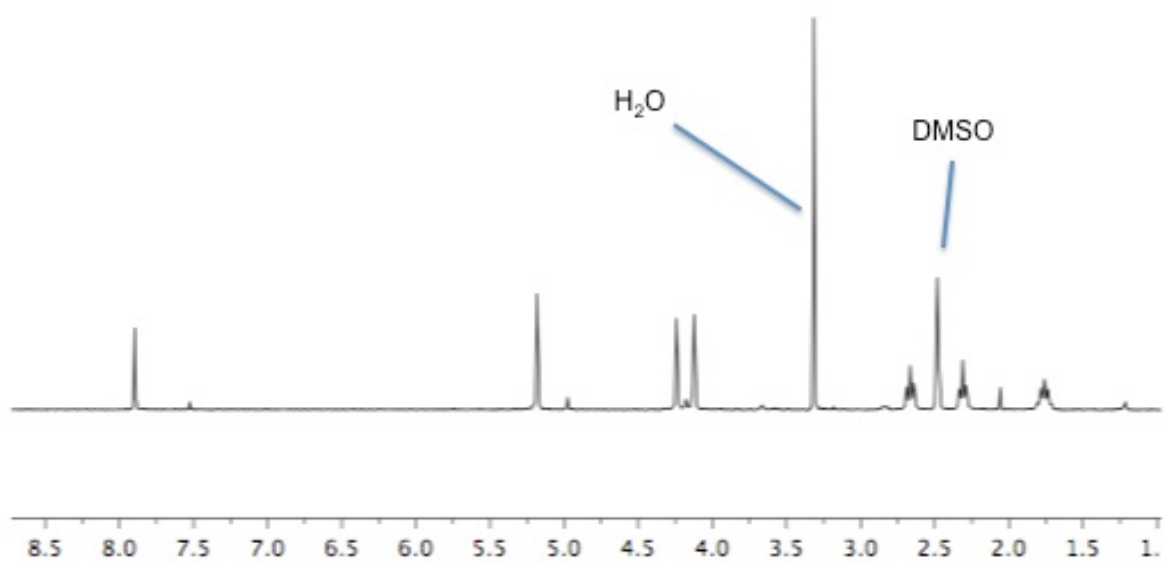

$^{13}\text{C}$  (acetone- $d_6$ )

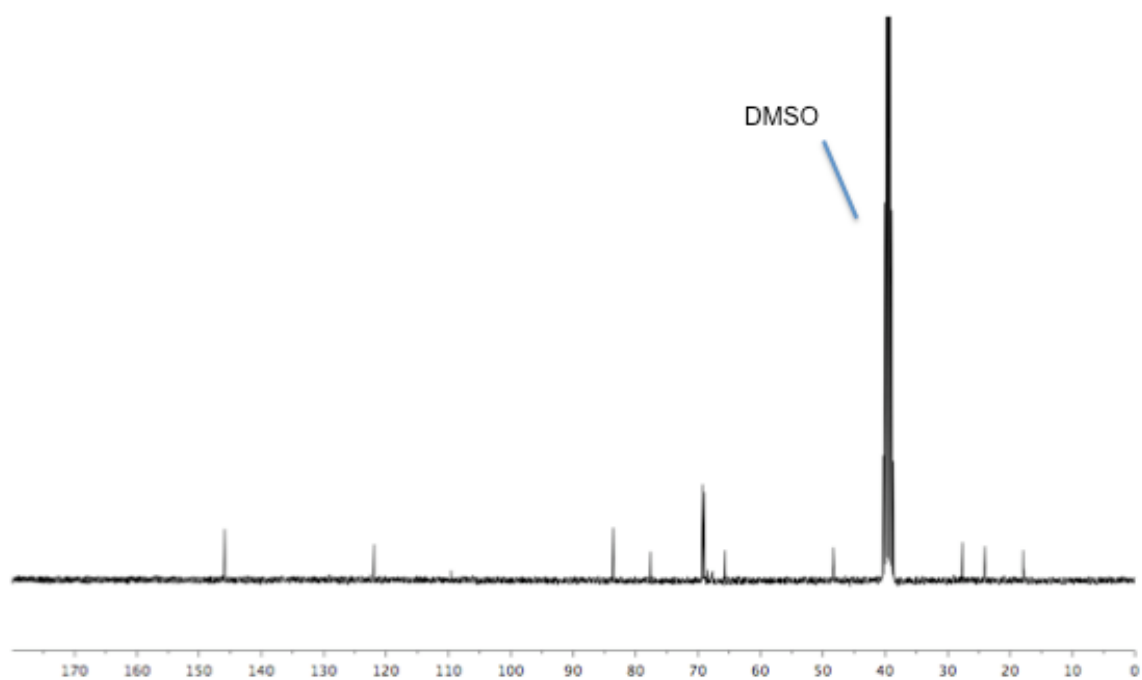

5

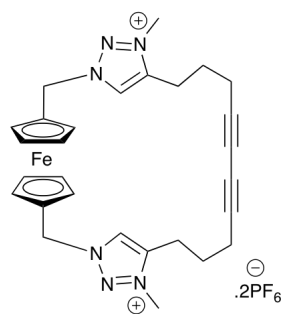

<sup>1</sup>H (CD<sub>3</sub>CN)

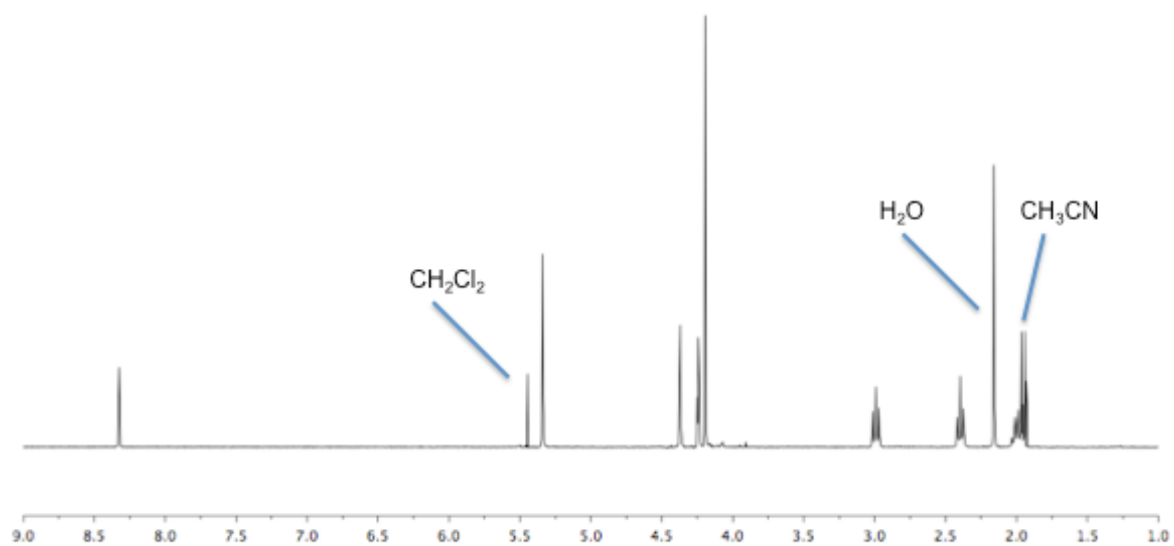

# $^{13}\text{C}$ ( $\text{CD}_3\text{CN}$ )

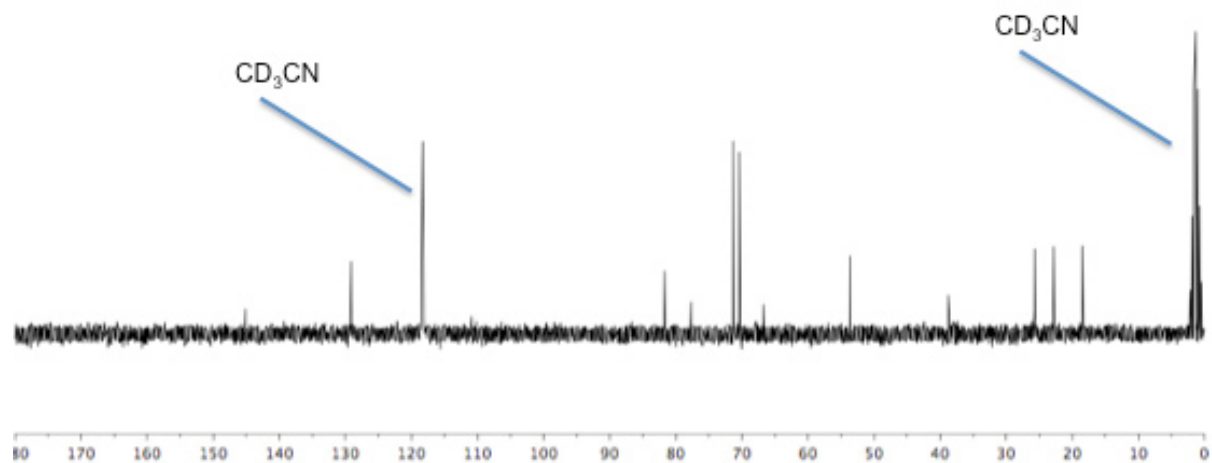

# $^{19}\text{F}$ ( $\text{CD}_3\text{CN}$ )

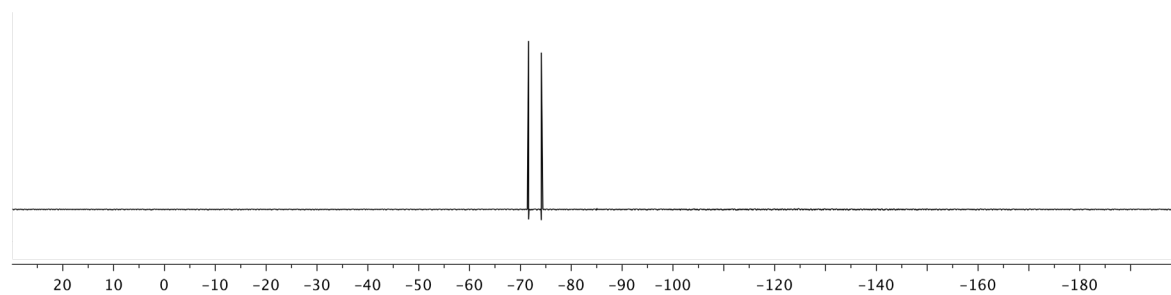

# $^{31}\text{P}$ ( $\text{CD}_3\text{CN}$ )

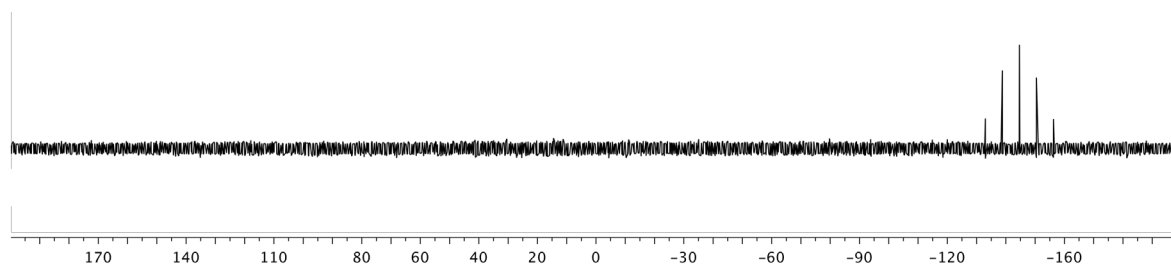

**6**

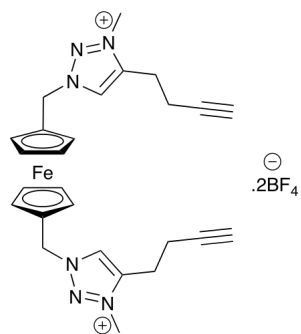

**<sup>1</sup>H (acetone-*d*<sub>6</sub>)**

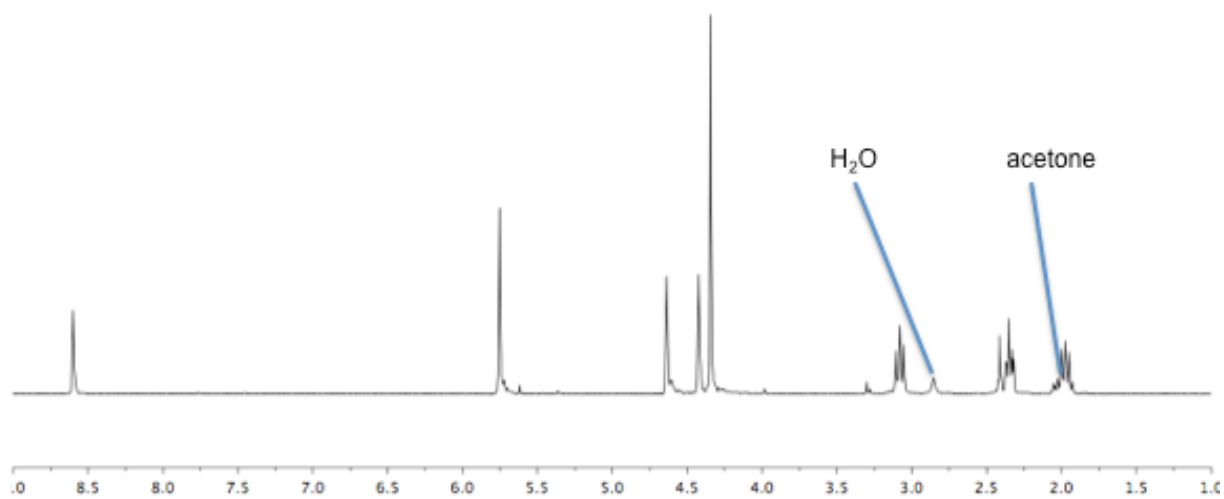



# $^{13}\text{C}$ (acetone- $d_6$ )

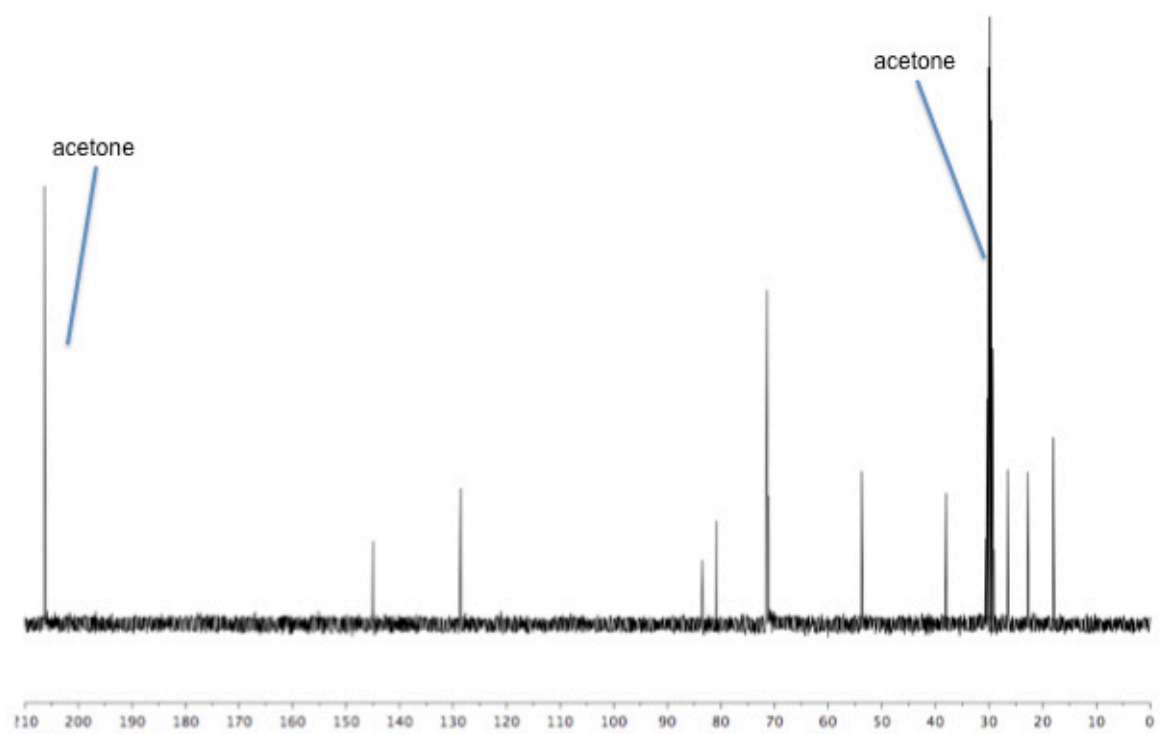

# $^{19}\text{F}$ (acetone- $d_6$ )

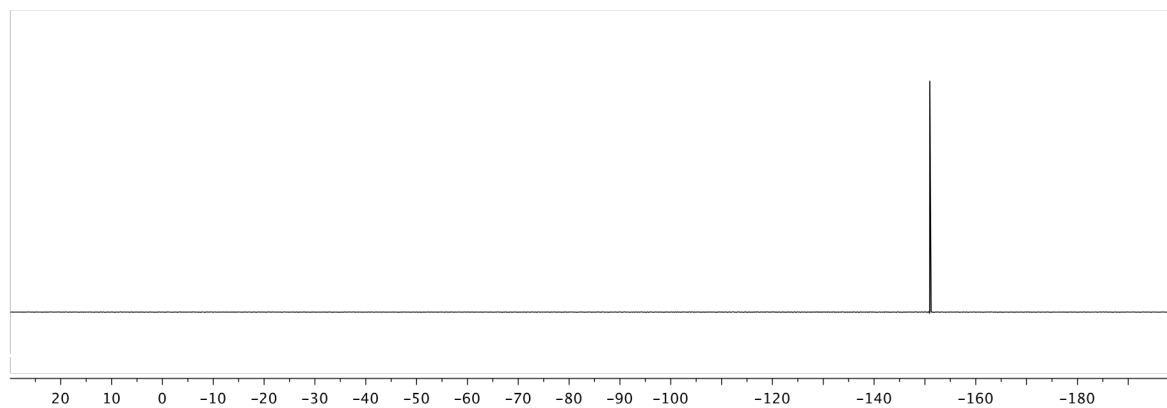

Supplement: Beilstein_J_Org_Chem-08-246-s001.pdf [file Beilstein_J_Org_Chem-08-246-s001.pdf]
